# Supplementary material
Source: ML conference proceedings conference paper supplement (https://aclanthology.org/D19-1584)
Supplement: Attachment [file D19-1584.Attachment.zip]

# HMEAE: Hierarchical Modular Event Argument Extraction

## - Appendix -

Xiaozhi Wang<sup>1\*</sup>, Ziqi Wang<sup>1\*</sup>, Xu Han<sup>1</sup>, Zhiyuan Liu<sup>1†</sup>,  
Juanzi Li<sup>1</sup>, Peng Li<sup>2</sup>, Maosong Sun<sup>1</sup>, Jie Zhou<sup>2</sup>, Xiang Ren<sup>3</sup>

<sup>1</sup>Department of Computer Science and Technology, Tsinghua University, Beijing, China

<sup>2</sup>Pattern Recognition Center, WeChat AI, Tencent Inc, China

<sup>3</sup>Department of Computer Science, University of Southern California, CA, USA

{xz-wang16, ziqi-wan16, hanxu17}@mails.tsinghua.edu.cn

### A Concept Hierarchy used in experiments

In our experiments, we manually design a concept hierarchy for ACE 2005 argument roles. Table 1 shows the concept hierarchy used in our model in detail.

The argument roles of TAC KBP 2016 is almost the same with ACE 2005 expect it merges all the “Time-XXX” into a unified “Time” role.

| Argument Role     | Superordinate Concept             |
|-------------------|-----------------------------------|
| Person            | Person                            |
| Place             | Place                             |
| Buyer             | Person, Organization              |
| Seller            | Person, Organization              |
| Beneficiary       | Person, Organization              |
| Price             | Entity                            |
| Artifact          | Entity                            |
| Origin            | Place                             |
| Destination       | Place                             |
| Giver             | Person, Organization              |
| Recipient         | Person, Organization              |
| Money             | Entity                            |
| Organization      | Organization                      |
| Agent             | Person, Place, Organization       |
| Victim            | Person                            |
| Instrument        | Good                              |
| Entity            | Entity                            |
| Attacker          | Person, Organization, Place, Good |
| Target            | Person, Organization, Place, Good |
| Defendent         | Person, Organization              |
| Adjudicator       | Person, Organization              |
| Prosecutor        | Person, Organization              |
| Plaintiff         | Person, Organization              |
| Crime             | Behavior                          |
| Position          | Place                             |
| Sentence          | Behavior                          |
| Vehicle           | Good                              |
| Time-Within       | Time                              |
| Time-Starting     | Time                              |
| Time-Ending       | Time                              |
| Time-Before       | Time                              |
| Time-After        | Time                              |
| Time-Holds        | Time                              |
| Time-At-Beginning | Time                              |
| Time-At-End       | Time                              |

\* indicates equal contribution

† Corresponding author: Z.Liu(liuzy@tsinghua.edu.cn)

Table 1: Our concept hierarchy for ACE 2005 used in our model.
